# Supplementary material for: Can microstructural MRI detect subclinical tissue injury in subjects with asymptomatic cervical spinal cord compression? A prospective cohort study
Source: PubMed Central journal article supplement — BMJ Open. 2018 Apr 13;8(4):e019809. doi: 10.1136/bmjopen-2017-019809 (PMC5905727; doi:10.1136/bmjopen-2017-019809), 2018-04-13
Supplement: bmjopen-2017-019809supp001.pdf [file bmjopen-2017-019809supp001.pdf]

## Supplemental Tables

**Supplemental Table 1: Anatomical Features of Spinal Cord Compression and Quantitative Shape Metrics.** MRI images were analyzed for degenerative changes causing cervical spinal cord compression, defined as indentation, flattening, or focal torsion. Levels with cord compression are listed, and a description of the degenerative changes and morphology of cord compression are provided. \* denotes an abnormal value of CR, solidity, or RR. ASCC: asymptomatic spinal cord compression, CR: compression ratio, DOC: disc  $\pm$  osteophyte complex, LF: ligamentum flavum, MCL: maximally compressed level, RR: relative rotation, Sol.: solidity.

| #  | Age, Sex | MCL  | Comp. Levels | CR (%) | Sol. (%) | RR (°) | MRI Features                                                   |
|----|----------|------|--------------|--------|----------|--------|----------------------------------------------------------------|
| 1  | 74M      | C5-6 | C4-5         | 51.5*  | 95.8     | -1.4   | Broad DOC flattening cord                                      |
|    |          |      | C5-6         | 49.3*  | 96.4     | 0.3    | Broad DOC flattening cord                                      |
|    |          |      | C6-7         | 48.6*  | 95.2     | -2.3   | Lateral DOC flattening and rotating cord                       |
| 2  | 55F      | C3-4 | C3-4         | 53.1*  | 93.9*    | -1.0   | Central DOC indenting and flattening cord, mild LF hypertrophy |
|    |          |      | C4-5         | 51.7*  | 94.6*    | -0.7   | Central DOC indenting and flattening cord, mild LF hypertrophy |
| 3  | 59F      | C5-6 | C3-4         | 47.8*  | 95.3*    | 1.3    | Broad DOC flattening and indenting cord                        |
|    |          |      | C4-5         | 48.5*  | 96.1     | 0.5    | Broad DOC flattening cord                                      |
|    |          |      | C5-6         | 45.6*  | 98.2     | 0.5    | Broad DOC flattening cord                                      |
| 4  | 28M      | C4-5 | C3-4         | 57.8   | 95.4*    | -1.2   | Central DOC indenting cord                                     |
|    |          |      | C4-5         | 53.4   | 94.4*    | -1.0   | Central DOC indenting cord                                     |
|    |          |      | C5-6         | 51.7   | 95.4*    | -1.4   | Central DOC indenting cord                                     |
| 5  | 30M      | C5-6 | C5-6         | 55.4   | 94.6*    | 2.1    | Central DOC indenting cord                                     |
|    |          |      | C6-7         | 53.9   | 93.9*    | 2.1    | Central DOC indenting cord                                     |
| 6  | 52F      | C4-5 | C3-4         | 56.4   | 94.3*    | -1.8   | Central DOC indenting cord, mild LF hypertrophy at C3-4, C4-5  |
|    |          |      | C4-5         | 60.8   | 92.7*    | -2.9   | Central DOC indenting cord, mild LF hypertrophy                |
|    |          |      | C5-6         | 61.1   | 95.4*    | -7.0*  | Lateral DOC indenting and rotating cord                        |
|    |          |      | C6-7         | 48.6*  | 93.8*    | 1.0    | Central DOC indenting and flattening cord                      |
| 7  | 60F      | C5-6 | C5-6         | 50.4*  | 95.4*    | 0.7    | Broad DOC flattening cord                                      |
| 8  | 69M      | C5-6 | C5-6         | 48.9*  | 97.5     | -0.7   | Broad DOC flattening cord                                      |
|    |          |      | C6-7         | 49.0*  | 95.8     | 2.5    | Broad DOC flattening cord                                      |
| 9  | 66F      | C4-5 | C4-5         | 55.4   | 94.2*    | 0.0    | Central DOC indenting cord, mild LF hypertrophy                |
| 10 | 51M      | C6-7 | C6-7         | 43.4*  | 91.6*    | -0.9   | Central DOC indenting and flattening cord                      |
| 11 | 39M      | C6-7 | C6-7         | 55.4   | 94.7*    | 4.5*   | Lateral DOC indenting and rotating cord                        |
| 12 | 49M      | C6-7 | C4-5         | 55.2   | 93.7*    | -0.2   | Central DOC indenting cord                                     |
|    |          |      | C5-6         | 49.5*  | 95.8     | 2.1    | Broad DOC flattening cord                                      |
|    |          |      | C6-7         | 46.1*  | 92.9*    | -5.0*  | Lateral DOC indenting, flattening, and rotating cord           |
| 13 | 50F      | C5-6 | C4-5         | 55.5   | 94.1*    | 0.5    | Central DOC indenting cord                                     |
|    |          |      | C5-6         | 55.0   | 95.3*    | -4.2*  | Broad lateral DOC indenting and rotating cord                  |
| 14 | 51F      | C4-5 | C3-4         | 55.8   | 95.4*    | -0.8   | Central DOC indenting cord                                     |
|    |          |      | C4-5         | 54.0   | 93.0*    | 1.9    | Central DOC indenting cord                                     |
|    |          |      | C5-6         | 54.3   | 95.6     | 0.6    | Central DOC indenting cord                                     |
| 15 | 55F      | C4-5 | C3-4         | 46.9*  | 96.2     | 0.8    | Broad DOC flattening cord                                      |
|    |          |      | C4-5         | 41.3*  | 95.4*    | 0.6    | Central DOC indenting cord                                     |
|    |          |      | C5-6         | 42.0*  | 96.0     | -0.4   | Broad DOC flattening cord                                      |
| 16 | 79F      | C5-6 | C4-5         | 52.3   | 95.5*    | -1.3   | Central DOC indenting cord                                     |
|    |          |      | C5-6         | 46.7*  | 93.3*    | -2.0   | Central DOC indenting and flattening cord                      |
| 17 | 77M      | C5-6 | C3-4         | 53.2*  | 92.8*    | -4.0*  | Lateral DOC indenting and rotating cord                        |
|    |          |      | C4-5         | 48.6*  | 95.8     | -0.4   | Broad central DOC flattening cord                              |

|    |     |      |      |       |       |       |                                                                           |
|----|-----|------|------|-------|-------|-------|---------------------------------------------------------------------------|
|    |     |      | C5-6 | 48.3* | 93.9* | -2.9* | Broad DOC indenting, flattening, and rotating cord                        |
| 18 | 44M | C5-6 | C3-4 | 55.6  | 94.9* | -0.7  | Central DOC indenting cord                                                |
|    |     |      | C4-5 | 55.7  | 95.1* | 1.4   | Central DOC indenting cord                                                |
|    |     |      | C5-6 | 45.4* | 93.4* | 0.0   | Central DOC indenting and flattening cord, mild LF hypertrophy            |
| 19 | 56M | C5-6 | C5-6 | 53.6  | 94.8* | -1.3  | Circumferential compression, flattening from broad DOC and LF hypertrophy |
| 20 | 54M | C6-7 | C4-5 | 51.5  | 95.3* | 0.1   | Central DOC indenting cord                                                |
|    |     |      | C6-7 | 46.6* | 96.7  | -2.4* | Broad DOC flattening and rotating cord                                    |

**Supplemental Table 2: Variations of MRI Measures with Subject Characteristics.**

The relationship between MRI metrics and subject characteristics (age, sex, height, weight, and cervical cord length) were analyzed with backward stepwise multiple linear regression that also included a binary independent variable for the presence of cord compression. Age was retained in each model regardless of significance, and linear coefficients for age and any other significant relationships (CSA with cervical cord length and MTR with height) were subsequently used to normalize MRI metrics.

| Region          | MRI Metric  | Age                                          | Sex | Height                           | Weight | Cervical Cord Length          |
|-----------------|-------------|----------------------------------------------|-----|----------------------------------|--------|-------------------------------|
| Rostral (C1-C3) | CSA         | $\beta=-0.168$<br>( $p=0.10$ )               | -   | -                                | -      | $\beta=4.81$<br>( $p=0.002$ ) |
|                 | FA          | $\beta=-6.06 \times 10^{-4}$<br>( $p=0.19$ ) | -   | -                                | -      | -                             |
|                 | MTR         | $\beta=-0.0472$<br>( $p=0.13$ )              | -   | $\beta=-0.181$<br>( $p=0.0004$ ) | -      | -                             |
|                 | T2*WI WM/GM | $\beta=2.34 \times 10^{-4}$<br>( $p=0.53$ )  | -   | -                                | -      | -                             |
| MCL or C4-5     | CSA         | $\beta=-0.195$<br>( $p=0.17$ )               | -   | -                                | -      | $\beta=4.90$<br>( $p=0.02$ )  |
|                 | FA          | $\beta=-7.16 \times 10^{-4}$<br>( $p=0.22$ ) | -   | -                                | -      | -                             |
|                 | MTR         | $\beta=-0.0545$<br>( $p=0.15$ )              | -   | $\beta=-0.146$<br>( $p=0.01$ )   | -      | -                             |
|                 | T2*WI WM/GM | $\beta=3.39 \times 10^{-5}$<br>( $p=0.91$ )  | -   | -                                | -      | -                             |
| Caudal (C6-C7)  | FA          | $\beta=-0.00127$<br>( $p=0.12$ )             | -   | -                                | -      | -                             |
|                 | T2*WI WM/GM | $\beta=1.20 \times 10^{-4}$<br>( $p=0.83$ )  | -   | -                                | -      | -                             |
